# Supplementary material for: Long-Term Impairment of Working Ability in Subjects under 60 Years of Age Hospitalised for COVID-19 at 2 Years of Follow-Up: A Cross-Sectional Study
Source: MDPI journal article supplement (doi:10.3390/v16050688), 2024-04-26
Supplement: s1 [file s1]

## SUPPLEMENTAL MATERIAL

**Table S1.** Cumulative incidence of specific long COVID associated symptoms, stratified per duration of the follow-up period.

|                         | <b>Follow-up ≤<br/>18 months<br/>(N=473)</b> | <b>Follow-up &gt;<br/>18 months<br/>(N=531)</b> | <b>Overall<br/>(N=1004)</b> |
|-------------------------|----------------------------------------------|-------------------------------------------------|-----------------------------|
| <b>Gender</b>           |                                              |                                                 |                             |
| F                       | 204 (42.9%)                                  | 238 (44.8%)                                     | 442<br>(43.9%)              |
| M                       | 268 (56.7%)                                  | 291 (54.8%)                                     | 559<br>(55.7%)              |
| Missing                 | 2 (0.4%)                                     | 1 (0.2%)                                        | 3 (0.3%)                    |
| <b>Nationality</b>      |                                              |                                                 |                             |
| Italian                 | 437 (92%)                                    | 491 (92.5%)                                     | 727<br>(72.4%)              |
| Not Italian             | 36 (7.6%)                                    | 39 (7.3%)                                       | 75 (7.4%)                   |
| Missing                 | 2 (0.4%)                                     | 1 (0.2%)                                        | 3 (0.3%)                    |
| <b>Age at admission</b> |                                              |                                                 |                             |
| Mean (SD)               | 63.2 (18.0)                                  | 60.6 (17.2)                                     | 61.8<br>(17.6)              |
| Median [Min, Max]       | 64.0 [16.5,<br>99.8]                         | 61.5 [17.5,<br>98.7]                            | 62.8 [16.5,<br>99.8]        |
| Missing                 | 1 (0.2%)                                     | 1 (0.2%)                                        | 2 (0.2%)                    |
| <b>Vaccinated</b>       |                                              |                                                 |                             |
| NO                      | 160 (33.8%)                                  | 348 (65.5%)                                     | 508<br>(50.6%)              |
| YES                     | 313 (66.2%)                                  | 183 (34.5%)                                     | 496<br>(49.4%)              |
| <b>Variant</b>          |                                              |                                                 |                             |
| Alpha                   | 186 (39.3%)                                  | 132 (24.9%)                                     | 318<br>(31.7%)              |
| Delta                   | 116 (24.5%)                                  | 14 (2.6%)                                       | 130<br>(12.9%)              |
| Omicron                 | 141 (29.8%)                                  | 0 (0%)                                          | 141<br>(14.0%)              |
| Wild-type               | 30 (6.3%)                                    | 385 (72.5%)                                     | 415<br>(41.3%)              |
| <b>Admission to ICU</b> |                                              |                                                 |                             |
| NO                      | 295 (62.4%)                                  | 196 (36.9%)                                     | 491<br>(48.9%)              |

|                                              | <b>Follow-up ≤<br/>18 months<br/>(N=473)</b> | <b>Follow-up &gt;<br/>18 months<br/>(N=531)</b> | <b>Overall<br/>(N=1004)</b> |
|----------------------------------------------|----------------------------------------------|-------------------------------------------------|-----------------------------|
| YES                                          | 30 (6.3%)                                    | 37 (7.0%)                                       | 67 (6.7%)                   |
| Missing                                      | 148 (31.3%)                                  | 298 (56.1%)                                     | 446<br>(44.4%)              |
| <b>NEUROLOGICAL SYMPTOMS</b>                 |                                              |                                                 |                             |
| <b>Headache</b>                              |                                              |                                                 |                             |
| NO                                           | 272 (57.5%)                                  | 369 (69.5%)                                     | 641<br>(63.8%)              |
| YES                                          | 201 (42.5%)                                  | 161 (30.3%)                                     | 362<br>(36.1%)              |
| Missing                                      | 0 (0%)                                       | 1 (0.2%)                                        | 1 (0.1%)                    |
| <b>Taste disorder (ageusia or dysgeusia)</b> |                                              |                                                 |                             |
| NO                                           | 433 (91.5%)                                  | 404 (76.1%)                                     | 837<br>(83.4%)              |
| YES                                          | 40 (8.5%)                                    | 126 (23.7%)                                     | 166<br>(16.5%)              |
| Missing                                      | 0 (0%)                                       | 1 (0.2%)                                        | 1 (0.1%)                    |
| <b>Smell disorder (anosmia)</b>              |                                              |                                                 |                             |
| NO                                           | 396 (83.7%)                                  | 368 (69.3%)                                     | 764<br>(76.1%)              |
| YES                                          | 77 (16.3%)                                   | 162 (30.5%)                                     | 239<br>(23.8%)              |
| Missing                                      | 0 (0%)                                       | 1 (0.2%)                                        | 1 (0.1%)                    |
| <b>Cognitive impairment</b>                  |                                              |                                                 |                             |
| NO                                           | 278 (58.8%)                                  | 270 (50.8%)                                     | 548<br>(54.6%)              |
| YES                                          | 115 (24.3%)                                  | 146 (27.5%)                                     | 261<br>(26.0%)              |
| Missing                                      | 80 (16.9%)                                   | 115 (21.7%)                                     | 195<br>(19.4%)              |
| <b>Memory deficits</b>                       |                                              |                                                 |                             |
| NO                                           | 371 (78.4%)                                  | 338 (63.7%)                                     | 709<br>(70.6%)              |
| YES                                          | 102 (21.6%)                                  | 192 (36.2%)                                     | 294<br>(29.3%)              |
| Missing                                      | 0 (0%)                                       | 1 (0.2%)                                        | 1 (0.1%)                    |
| <b>Difficulty concentrating</b>              |                                              |                                                 |                             |
| NO                                           | 352 (74.4%)                                  | 389 (73.3%)                                     | 741<br>(73.8%)              |
| YES                                          | 121 (25.6%)                                  | 139 (26.2%)                                     | 260<br>(25.9%)              |
| Missing                                      | 0 (0%)                                       | 3 (0.6%)                                        | 3 (0.3%)                    |
| <b>Dizziness</b>                             |                                              |                                                 |                             |
| NO                                           | 423 (89.4%)                                  | 478 (90.0%)                                     | 901<br>(89.7%)              |

|                                | Follow-up ≤<br>18 months<br>(N=473) | Follow-up ><br>18 months<br>(N=531) | Overall<br>(N=1004) |
|--------------------------------|-------------------------------------|-------------------------------------|---------------------|
| YES                            | 50 (10.6%)                          | 51 (9.6%)                           | 101<br>(10.1%)      |
| Missing                        | 0 (0%)                              | 2 (0.4%)                            | 2 (0.2%)            |
| <b>Tremors</b>                 |                                     |                                     |                     |
| NO                             | 444 (93.9%)                         | 478 (90.0%)                         | 922<br>(91.8%)      |
| YES                            | 29 (6.1%)                           | 51 (9.6%)                           | 80 (8.0%)           |
| Missing                        | 0 (0%)                              | 2 (0.4%)                            | 2 (0.2%)            |
| <b>Visual impairment</b>       |                                     |                                     |                     |
| NO                             | 369 (78.0%)                         | 413 (77.8%)                         | 782<br>(77.9%)      |
| YES                            | 24 (5.1%)                           | 3 (0.6%)                            | 27 (2.7%)           |
| Missing                        | 80 (16.9%)                          | 115 (21.7%)                         | 195<br>(19.4%)      |
| <b>PSICHIATRIC SYMPTOMS</b>    |                                     |                                     |                     |
| <b>PTSD score</b>              |                                     |                                     |                     |
| Mean (SD)                      | 1.00 (0.973)                        | 1.03 (1.31)                         | 1.01<br>(1.15)      |
| Median [Min, Max]              | 1.00 [0, 4.00]                      | 0 [0, 5.00]                         | 1.00 [0,<br>5.00]   |
| Missing                        | 8 (1.7%)                            | 84 (15.8%)                          | 92 (9.2%)           |
| <b>Depression – HADS score</b> |                                     |                                     |                     |
| Mean (SD)                      | 4.92 (3.99)                         | 4.58 (4.44)                         | 4.75<br>(4.21)      |
| Median [Min, Max]              | 5.00 [0, 20.0]                      | 5.00 [0, 21.0]                      | 5.00 [0,<br>21.0]   |
| Missing                        | 10 (2.1%)                           | 84 (15.8%)                          | 94 (9.4%)           |
| <b>Sleep disorder</b>          |                                     |                                     |                     |
| NO                             | 410 (86.7%)                         | 473 (89.1%)                         | 883<br>(87.9%)      |
| YES                            | 63 (13.3%)                          | 58 (10.9%)                          | 121<br>(12.1%)      |
| <b>Anxiety – HADS score</b>    |                                     |                                     |                     |
| Mean (SD)                      | 5.77 (4.51)                         | 5.26 (4.86)                         | 5.50<br>(4.70)      |
| Median [Min, Max]              | 4.00 [0, 18.0]                      | 4.00 [0, 21.0]                      | 4.00 [0,<br>21.0]   |
| Missing                        | 5 (1.1%)                            | 1 (0.2%)                            | 6 (0.6%)            |
| <b>RESPIRATORY SYMPTOMS</b>    |                                     |                                     |                     |
| <b>Cough</b>                   |                                     |                                     |                     |
| NO                             | 381 (80.5%)                         | 415 (78.2%)                         | 796<br>(79.3%)      |

|                                 | <b>Follow-up ≤<br/>18 months<br/>(N=473)</b> | <b>Follow-up &gt;<br/>18 months<br/>(N=531)</b> | <b>Overall<br/>(N=1004)</b> |
|---------------------------------|----------------------------------------------|-------------------------------------------------|-----------------------------|
| YES                             | 92 (19.5%)                                   | 115 (21.7%)                                     | 207<br>(20.6%)              |
| Missing                         | 0 (0%)                                       | 1 (0.2%)                                        | 1 (0.1%)                    |
| <b>Dyspnea</b>                  |                                              |                                                 |                             |
| NO                              | 401 (84.8%)                                  | 434 (81.7%)                                     | 835<br>(83.2%)              |
| YES                             | 72 (15.2%)                                   | 96 (18.1%)                                      | 168<br>(16.7%)              |
| Missing                         | 0 (0%)                                       | 1 (0.2%)                                        | 1 (0.1%)                    |
| <b>Oxygen use</b>               |                                              |                                                 |                             |
| NO                              | 471 (99.6%)                                  | 524 (98.7%)                                     | 995<br>(99.1%)              |
| YES                             | 2 (0.4%)                                     | 5 (0.9%)                                        | 7 (0.7%)                    |
| Missing                         | 0 (0%)                                       | 2 (0.4%)                                        | 2 (0.2%)                    |
| <b>Voice change – VHI score</b> |                                              |                                                 |                             |
| Mean (SD)                       | 3.92 (3.19)                                  | 3.57 (3.20)                                     | 3.74<br>(3.20)              |
| Median [Min, Max]               | 4.00 [0, 10.0]                               | 3.00 [0, 10.0]                                  | 4.00 [0,<br>10.0]           |
| Missing                         | 0 (0%)                                       | 1 (0.2%)                                        | 1 (0.1%)                    |
| <b>Mobility impairment</b>      |                                              |                                                 |                             |
| NO                              | 465 (98.3%)                                  | 525 (98.9%)                                     | 990<br>(98.6%)              |
| YES                             | 8 (1.7%)                                     | 5 (0.9%)                                        | 13 (1.3%)                   |
| Missing                         | 0 (0%)                                       | 1 (0.2%)                                        | 1 (0.1%)                    |
| <b>Functional impairment</b>    |                                              |                                                 |                             |
| NO                              | 471 (99.6%)                                  | 526 (99.1%)                                     | 997<br>(99.3%)              |
| YES                             | 2 (0.4%)                                     | 4 (0.8%)                                        | 6 (0.6%)                    |
| Missing                         | 0 (0%)                                       | 1 (0.2%)                                        | 1 (0.1%)                    |
| <b>Weight loss</b>              |                                              |                                                 |                             |
| NO                              | 444 (93.9%)                                  | 492 (92.7%)                                     | 936<br>(93.2%)              |
| YES                             | 29 (6.1%)                                    | 38 (7.2%)                                       | 67 (6.7%)                   |
| Missing                         | 0 (0%)                                       | 1 (0.2%)                                        | 1 (0.1%)                    |
| <b>Myalgia</b>                  |                                              |                                                 |                             |
| NO                              | 430 (90.9%)                                  | 465 (87.6%)                                     | 895<br>(89.1%)              |
| YES                             | 43 (9.1%)                                    | 65 (12.2%)                                      | 108<br>(10.8%)              |
| Missing                         | 0 (0%)                                       | 1 (0.2%)                                        | 1 (0.1%)                    |

|                          | Follow-up ≤<br>18 months<br>(N=473) | Follow-up ><br>18 months<br>(N=531) | Overall<br>(N=1004) |
|--------------------------|-------------------------------------|-------------------------------------|---------------------|
| <b>Pain</b>              |                                     |                                     |                     |
| NO                       | 389 (82.2%)                         | 461 (86.8%)                         | 850<br>(84.7%)      |
| YES                      | 84 (17.8%)                          | 68 (12.8%)                          | 152<br>(15.1%)      |
| Missing                  | 0 (0%)                              | 2 (0.4%)                            | 2 (0.2%)            |
| <b>Fever</b>             |                                     |                                     |                     |
| NO                       | 463 (97.9%)                         | 519 (97.7%)                         | 982<br>(97.8%)      |
| YES                      | 10 (2.1%)                           | 11 (2.1%)                           | 21 (2.1%)           |
| Missing                  | 0 (0%)                              | 1 (0.2%)                            | 1 (0.1%)            |
| <b>Fatigue</b>           |                                     |                                     |                     |
| NO                       | 324 (68.5%)                         | 394 (74.2%)                         | 718<br>(71.5%)      |
| YES                      | 149 (31.5%)                         | 136 (25.6%)                         | 285<br>(28.4%)      |
| Missing                  | 0 (0%)                              | 1 (0.2%)                            | 1 (0.1%)            |
| <b>Arthralgia</b>        |                                     |                                     |                     |
| NO                       | 421 (89.0%)                         | 459 (86.4%)                         | 880<br>(87.6%)      |
| YES                      | 52 (11.0%)                          | 71 (13.4%)                          | 123<br>(12.3%)      |
| Missing                  | 0 (0%)                              | 1 (0.2%)                            | 1 (0.1%)            |
| <b>Sore throat</b>       |                                     |                                     |                     |
| NO                       | 462 (97.7%)                         | 515 (97.0%)                         | 977<br>(97.3%)      |
| YES                      | 11 (2.3%)                           | 14 (2.6%)                           | 25 (2.5%)           |
| Missing                  | 0 (0%)                              | 2 (0.4%)                            | 2 (0.2%)            |
| <b>Sweats</b>            |                                     |                                     |                     |
| NO                       | 471 (99.6%)                         | 527 (99.2%)                         | 998<br>(99.4%)      |
| YES                      | 2 (0.4%)                            | 3 (0.6%)                            | 5 (0.5%)            |
| Missing                  | 0 (0%)                              | 1 (0.2%)                            | 1 (0.1%)            |
| <b>CARDIAC SYMPHTOMS</b> |                                     |                                     |                     |
| <b>Palpitation</b>       |                                     |                                     |                     |
| NO                       | 390 (82.5%)                         | 447 (84.2%)                         | 837<br>(83.4%)      |
| YES                      | 83 (17.5%)                          | 82 (15.4%)                          | 165<br>(16.4%)      |
| Missing                  | 0 (0%)                              | 2 (0.4%)                            | 2 (0.2%)            |
| <b>Chest pain</b>        |                                     |                                     |                     |

|                               | Follow-up ≤<br>18 months<br>(N=473) | Follow-up ><br>18 months<br>(N=531) | Overall<br>(N=1004) |
|-------------------------------|-------------------------------------|-------------------------------------|---------------------|
| NO                            | 371 (78.4%)                         | 415 (78.2%)                         | 786<br>(78.3%)      |
| YES                           | 102 (21.6%)                         | 114 (21.5%)                         | 216<br>(21.5%)      |
| Missing                       | 0 (0%)                              | 2 (0.4%)                            | 2 (0.2%)            |
| <b>Flushing</b>               |                                     |                                     |                     |
| NO                            | 466 (98.5%)                         | 521 (98.1%)                         | 987<br>(98.3%)      |
| YES                           | 7 (1.5%)                            | 7 (1.3%)                            | 14 (1.4%)           |
| Missing                       | 0 (0%)                              | 3 (0.6%)                            | 3 (0.3%)            |
| <b>New onset hypertension</b> |                                     |                                     |                     |
| NO                            | 471 (99.6%)                         | 526 (99.1%)                         | 997<br>(99.3%)      |
| YES                           | 2 (0.4%)                            | 3 (0.6%)                            | 5 (0.5%)            |
| Missing                       | 0 (0%)                              | 2 (0.4%)                            | 2 (0.2%)            |
| <b>DIGESTIVE SYMPTOMS</b>     |                                     |                                     |                     |
| <b>Abdominal pain</b>         |                                     |                                     |                     |
| NO                            | 426 (90.1%)                         | 489 (92.1%)                         | 915<br>(91.1%)      |
| YES                           | 47 (9.9%)                           | 41 (7.7%)                           | 88 (8.8%)           |
| Missing                       | 0 (0%)                              | 1 (0.2%)                            | 1 (0.1%)            |
| <b>Diarrhea</b>               |                                     |                                     |                     |
| NO                            | 457 (96.6%)                         | 499 (94.0%)                         | 956<br>(95.2%)      |
| YES                           | 16 (3.4%)                           | 31 (5.8%)                           | 47 (4.7%)           |
| Missing                       | 0 (0%)                              | 1 (0.2%)                            | 1 (0.1%)            |
| <b>Vomit</b>                  |                                     |                                     |                     |
| NO                            | 471 (99.6%)                         | 524 (98.7%)                         | 995<br>(99.1%)      |
| YES                           | 2 (0.4%)                            | 5 (0.9%)                            | 7 (0.7%)            |
| Missing                       | 0 (0%)                              | 2 (0.4%)                            | 2 (0.2%)            |
| <b>Loss of appetite</b>       |                                     |                                     |                     |
| NO                            | 446 (94.3%)                         | 505 (95.1%)                         | 951<br>(94.7%)      |
| YES                           | 27 (5.7%)                           | 25 (4.7%)                           | 52 (5.2%)           |
| Missing                       | 0 (0%)                              | 1 (0.2%)                            | 1 (0.1%)            |
| <b>Rash</b>                   |                                     |                                     |                     |
| NO                            | 465 (98.3%)                         | 510 (96.0%)                         | 975<br>(97.1%)      |

|                  | <b>Follow-up ≤<br/>18 months<br/>(N=473)</b> | <b>Follow-up &gt;<br/>18 months<br/>(N=531)</b> | <b>Overall<br/>(N=1004)</b> |
|------------------|----------------------------------------------|-------------------------------------------------|-----------------------------|
| YES              | 8 (1.7%)                                     | 19 (3.6%)                                       | 27 (2.7%)                   |
| Missing          | 0 (0%)                                       | 2 (0.4%)                                        | 2 (0.2%)                    |
| <b>Hair loss</b> |                                              |                                                 |                             |
| NO               | 446 (94.3%)                                  | 481 (90.6%)                                     | 927<br>(92.3%)              |
| YES              | 27 (5.7%)                                    | 49 (9.2%)                                       | 76 (7.6%)                   |
| Missing          | 0 (0%)                                       | 1 (0.2%)                                        | 1 (0.1%)                    |
